# Supplementary material for: MWCNTs Decorated with TiO2 as Highly Performing Filler in the Preparation of Nanocomposite Membranes for Scalable Photocatalytic Degradation of Bisphenol A in Water
Source: MDPI journal article supplement (doi:10.3390/nano13162325), 2023-08-13
Supplement: s1 [file s1]

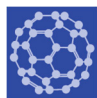

## Supplementary Materials

# MWCNTs decorated with TiO<sub>2</sub> as highly-performing filler in the preparation of nanocomposite membranes for scalable photocatalytic degradation of Bisphenol-A in water

Antonio Tursi <sup>1</sup>, Amerigo Beneduci <sup>1,2</sup>, Isabella Nicotera <sup>3,4</sup>, Cataldo Simari <sup>3,4\*</sup>

Department of Chemistry and Chemical Technologies, University of Calabria, Via P. Bucci, Cubo 15D, 87036 Arcavacata di Rende, CS, Italy; antonio.tursi@unical.it (A.T.); amerigo.beneduci@unical.it (A.B.); isabella.nicotera@unical.it (I.N.)

<sup>2</sup> SIRiA S.r.l.-Servizi Integrati e Ricerche per l'Ambiente, c/o Department of Chemistry and Chemical Technologies, Spin-Off of the University of Calabria, Via P. Bucci, Cubo 15D, 87036 Arcavacata di Rende, CS, Italy

<sup>3</sup> National Reference Centre for Electrochemical Energy Storage (GISEL)—INSTM, Via G. Giusti 9, 50121 Firenze, Italy

\* Correspondence: cataldo.simari@unical.it; Tel.: +39-0984-493385; Fax: +39-0984-492044

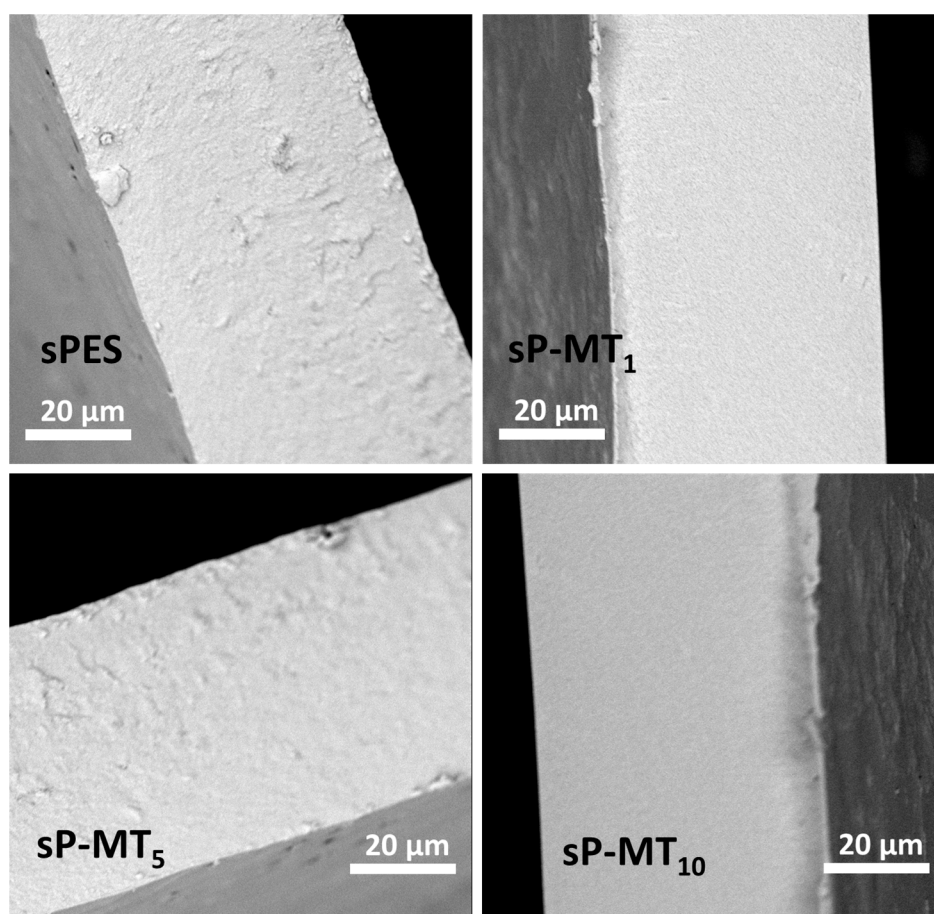

**Figure S1.** Cross-sectional SEM images of the sPES-based membranes at different filler loadings.

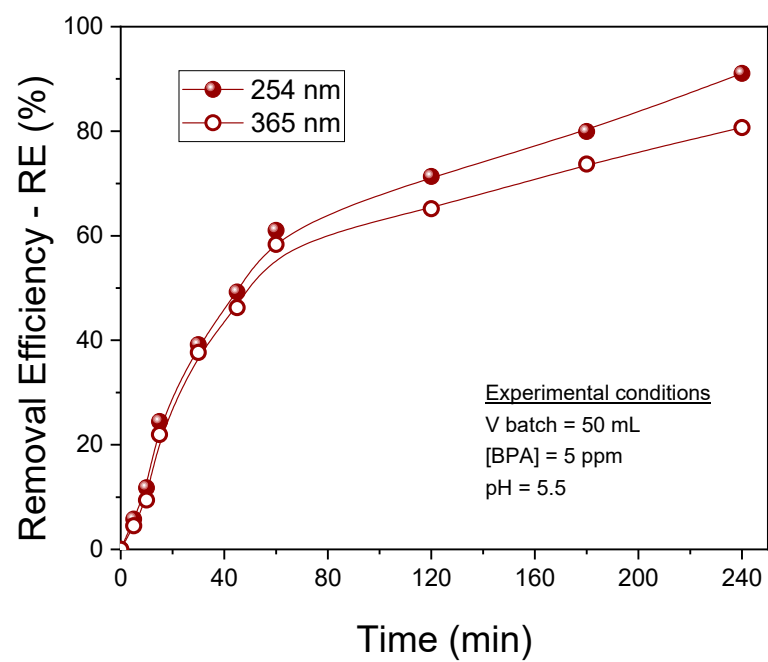

**Figure S2.** BPA Removal Efficiency vs. time for sP\_MT<sub>10</sub> at two different UV wavelength, i.e., 254 and 365 nm.
